# Supplementary material for: Intestinal Parasites in Captive Non-Human Primates in Polish Zoological Gardens: Molecular Identification of Common Intestinal Protozoa
Source: Research Square preprint supplement (doi:10.21203/rs.3.rs-7240201/v1), 2025-10-06
Supplement: Supplementary file 1 [file cd663cc70d209a6aebf34a83.docx]

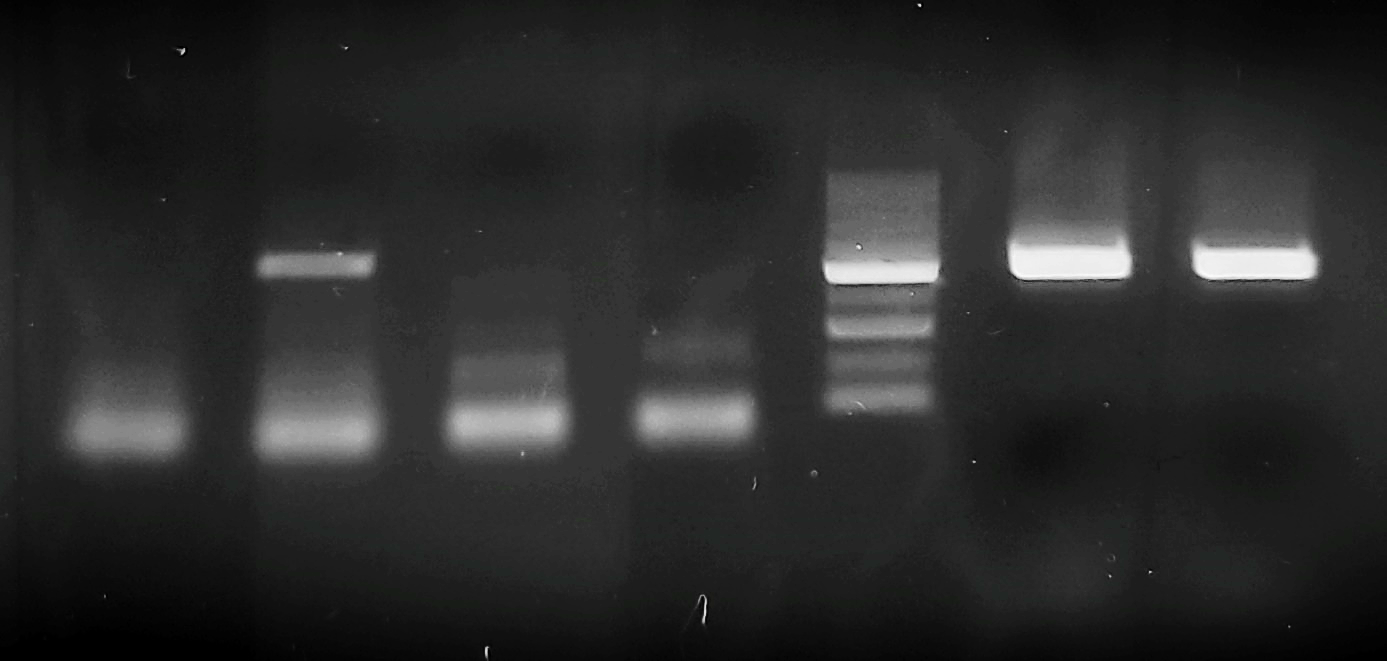


1 2 3 4 M 5 6

Electrophoresis results of the PCR products on a 1.5% agarose gel. The amplified PCR product 511 bp Giardia intestinalis – beta-giardin gene fragment. Lanes 5 and 6—positive controls G. intestinalis assemblages A and B, lane 2—positive sample, lanes 1, 3 and 4 negative samples; M—marker (Marker 1, A&A Biotechnology, Gdańsk, Poland)


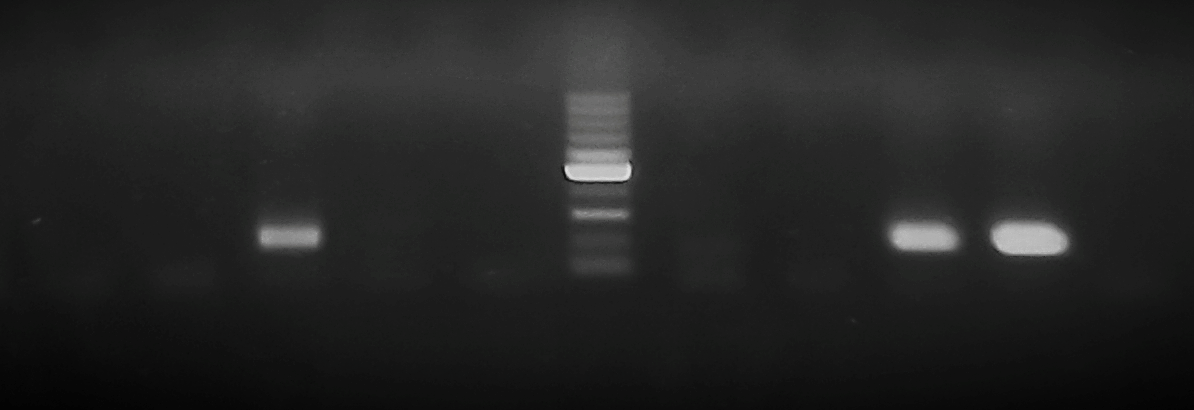


1 2 3 4 5 M 6 7 8 9 10

Electrophoresis results of the PCR products on a 1.5% agarose gel. The amplified PCR product 166 bp, SSU rRNA of Entamoeba coli. Lane 9—positive control E. coli, lane 10-negative control (ddH2), lane 3—positive sample, lanes 1,2,4-7 – negative samples; M—marker (Marker 1, A&A Biotechnology, Gdańsk, Poland).


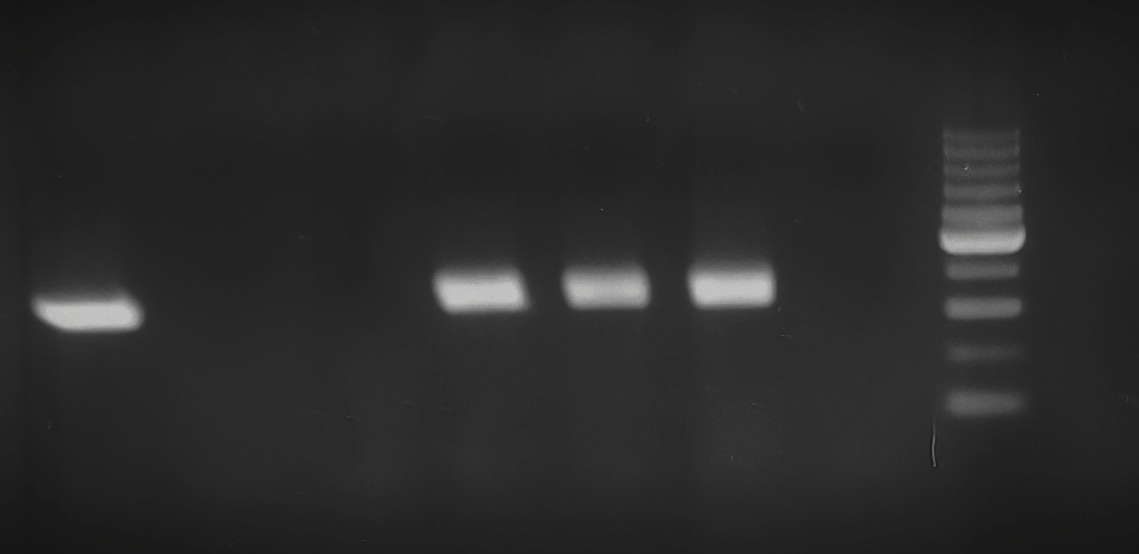


1 2 3 4 5 6 7 M

Electrophoresis results of the PCR products on a 1.5% agarose gel. The amplified PCR product 339 bp, 18s rRNA of Pentatrichomonas hominis. Lane 1—positive control P. hominis, lane 2-negative control (ddH2), lanes 4-6—positive samples, lanes 2,3,7 – negative samples; M—marker (Marker 1, A&A Biotechnology, Gdańsk, Poland).
